# Supplementary material for: Tuning the electrochemical behavior of graphene oxide and reduced graphene oxide via doping hexagonal BN for high capacity negative electrodes for Li and Na ion batteries
Source: Royal Society of Chemistry journal article supplement (doi:10.1039/d2cp05451e), 2023-01-01
Supplement: d2cp05451e1.pdf [file d2cp05451e1.pdf]

## Supporting Information

### **Tuning the electrochemical behavior of graphene oxide and reduced graphene oxide via doping hexagonal BN for high capacity negative electrode for Li and Na ion batteries**

Siraj Ud Daula Shamim<sup>1\*</sup>, Afiya Akter Piya<sup>1</sup>, Mohammad Sadiqur Rahman<sup>2</sup>, Syed Mahedi Hasan<sup>3</sup>, Md Kamal Hossain<sup>2</sup>, Farid Ahmed<sup>2</sup>

<sup>1</sup>Department of Physics, Mawlana Bhashani Science and Technology University, Tangail, Bangladesh.

<sup>2</sup>Department of Physics, Jahangirnagar University, Dhaka, Bangladesh.

<sup>3</sup> Baylor University, Texas, USA.

\*Corresponding author: Email: [sdshamim@mbstu.ac.bd](mailto:sdshamim@mbstu.ac.bd) (Siraj Ud Daula Shamim)

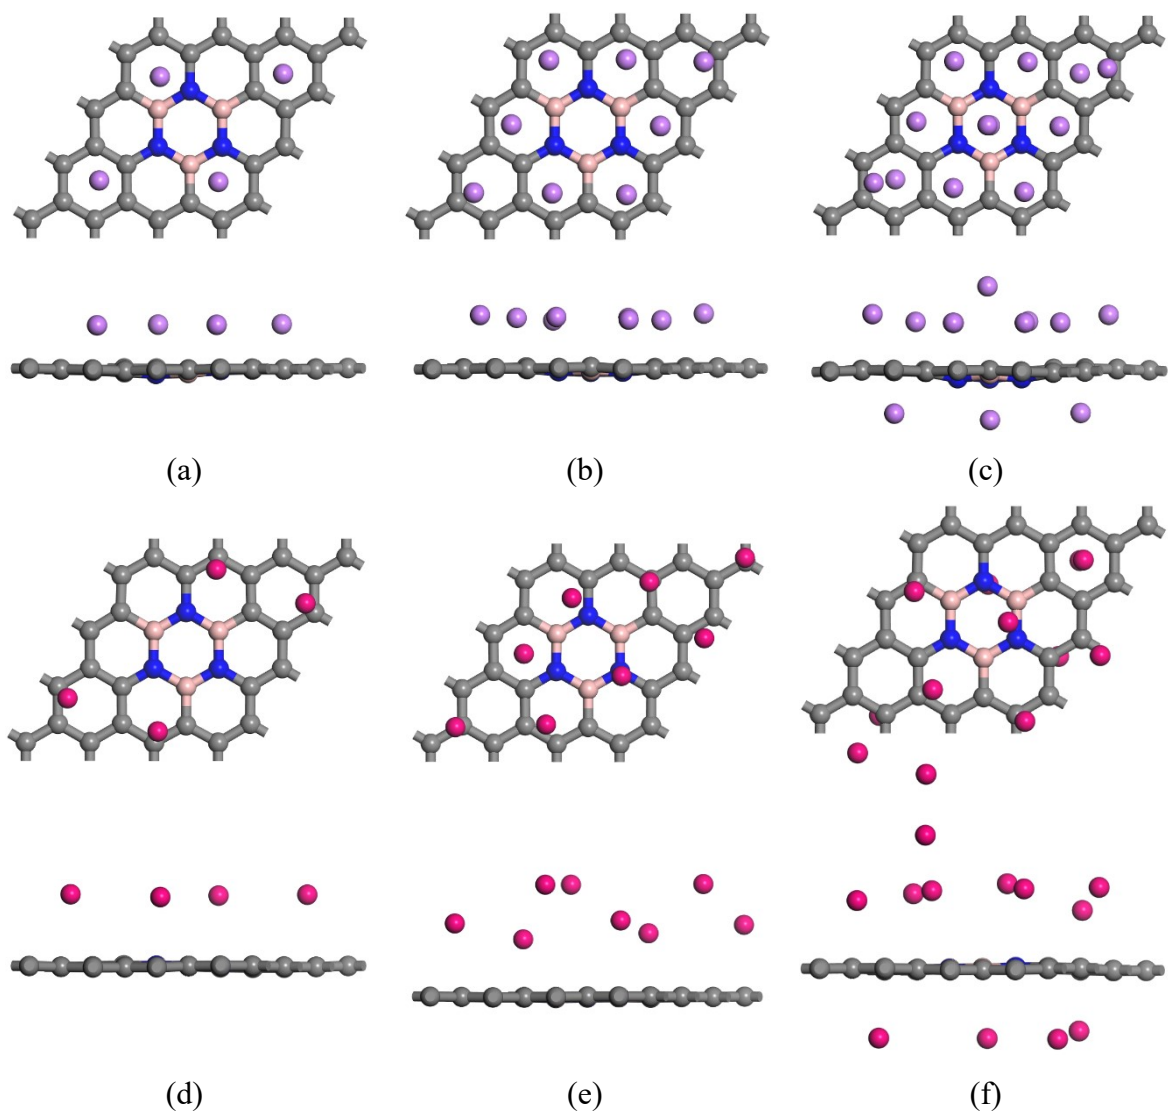

**Figure S1:** Front and side views of optimized BN-G with diverse number of (a) 4Li, (b) 8Li, (c) 10Li, (d) 4Na, (e) 8Na and (f) 10Na atoms respectively.

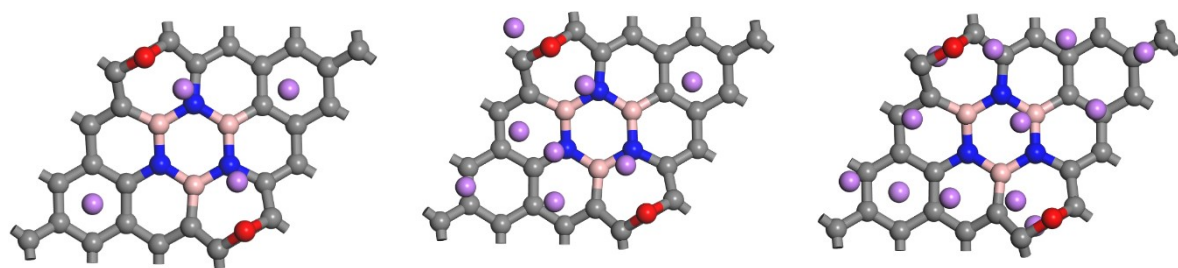

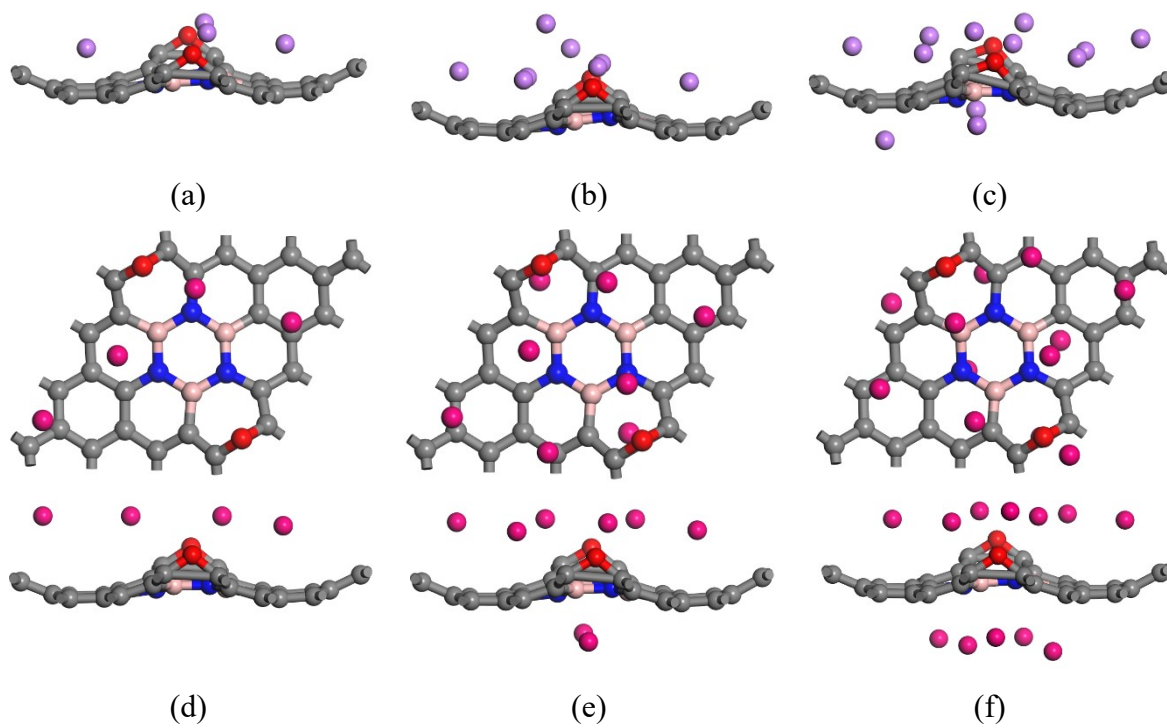

**Figure S2:** Front and side views of optimized BN-GO with diverse number of (a) 4Li, (b) 8Li, (c) 10Li, (d) 4Na, (e) 8Na and (f) 10Na atoms respectively.

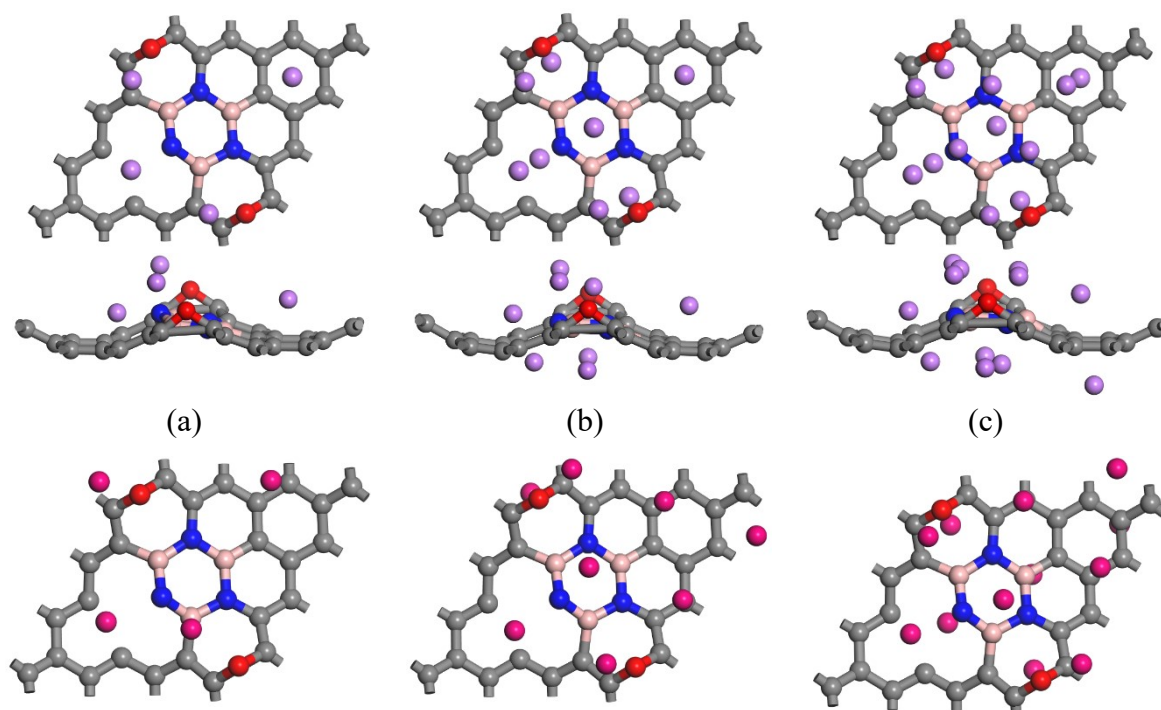

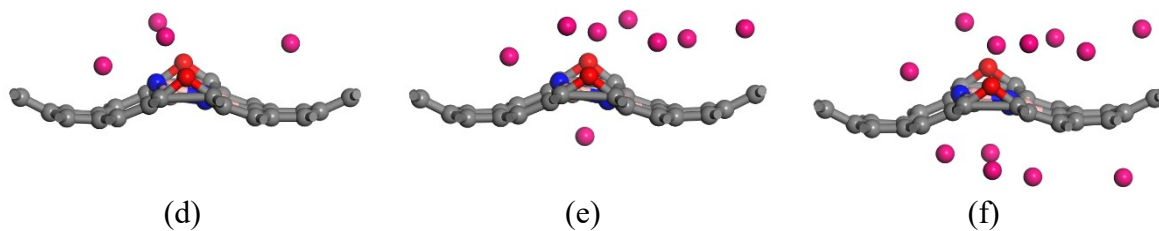

**Figure S3:** Front and side views of optimized BN-rGO with diverse number of (a) 4Li, (b) 8Li, (c) 10Li, (d) 4Na, (e) 8Na and (f) 10Na atoms respectively.

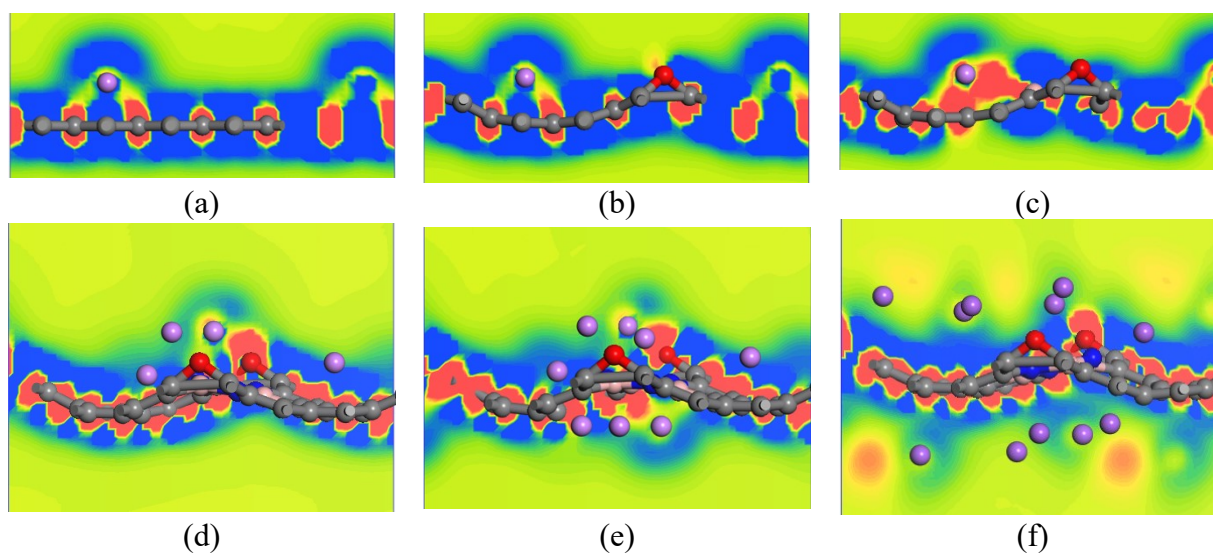

**Figure S4:** Deformation density map for most stable adsorption site for Li adsorption on (a) BN-G, (b) BN-GO and (c) BN-rGO and diverse number of (d) 4 Li, (e) 8 Li and (f) 12 Li on BN-rGO; where red color indicates the electron enrichment area and blue color indicates the electron deficient area. The iso-surface is set at  $\pm 0.02 \text{ e}/\text{\AA}^3$ .

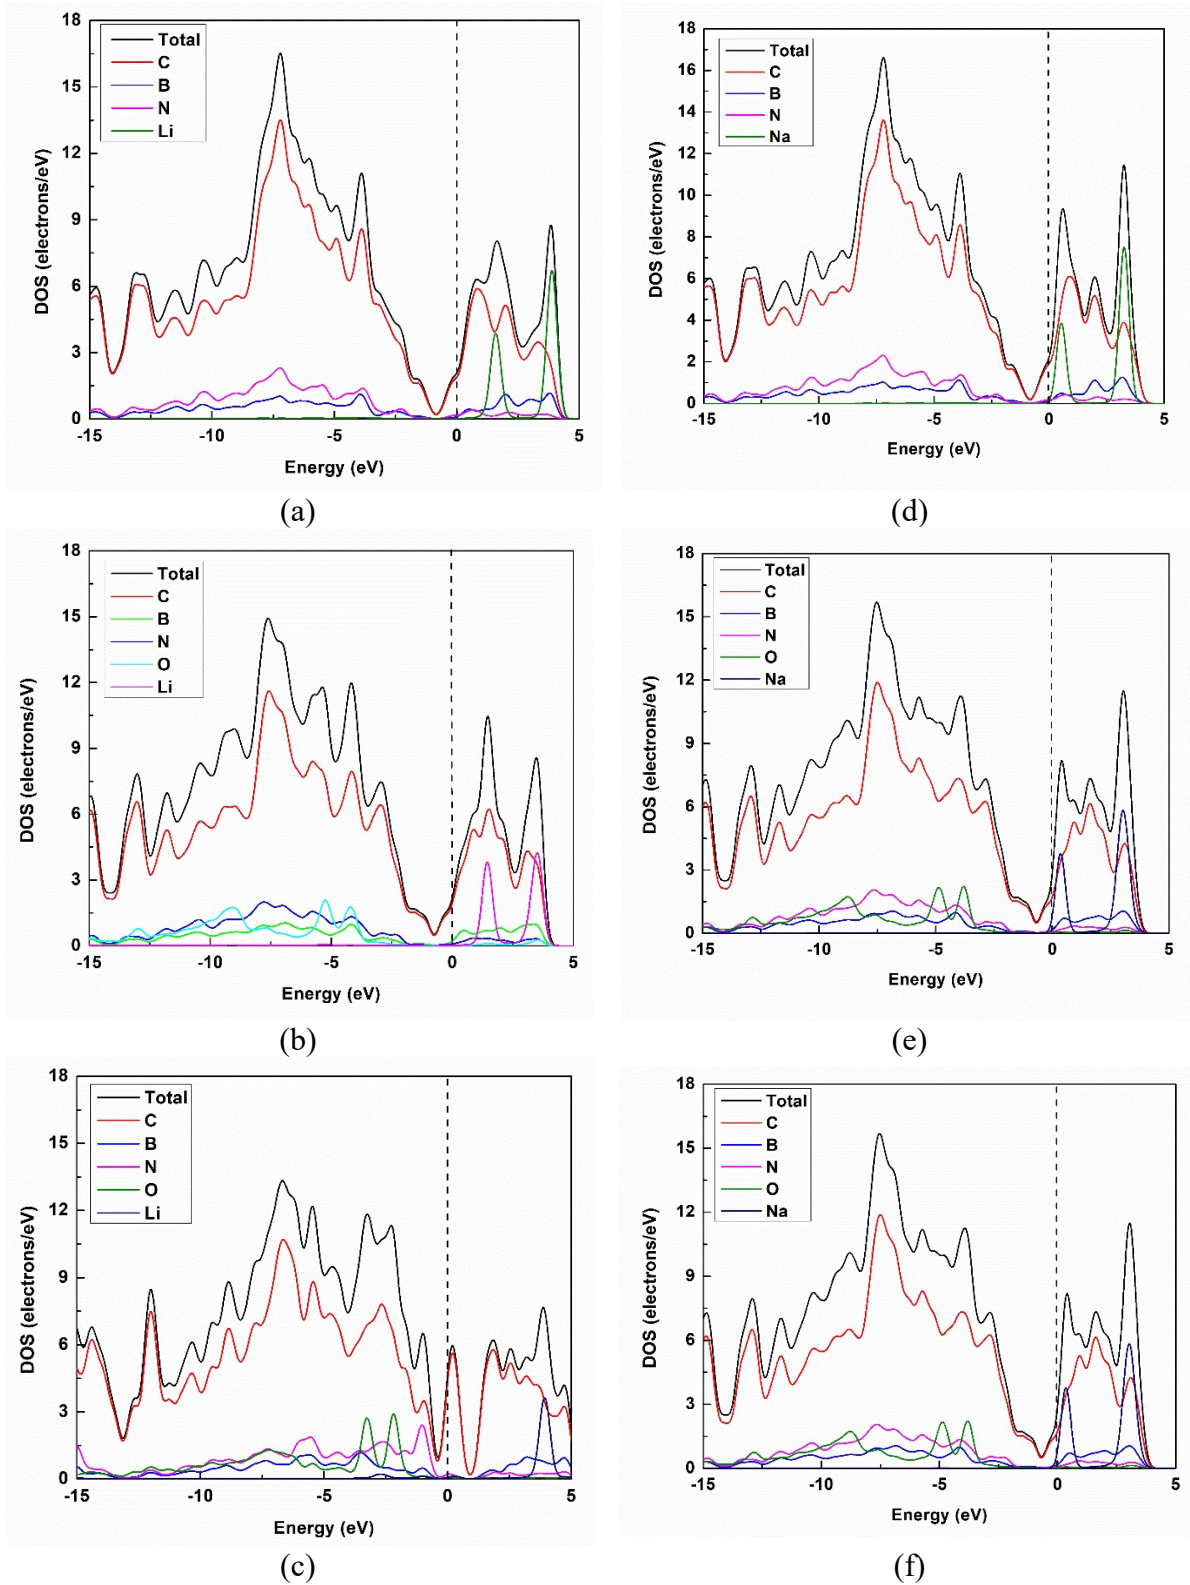

**Figure S5:** PDOS of Li atom adsorption on (a) BN-G, (b) BN-GO and (c) BN-rGO nanosheets and Na atom adsorption on (d) BN-G, (e) BN-GO and (f) BN-rGO at most stable adsorption sites.

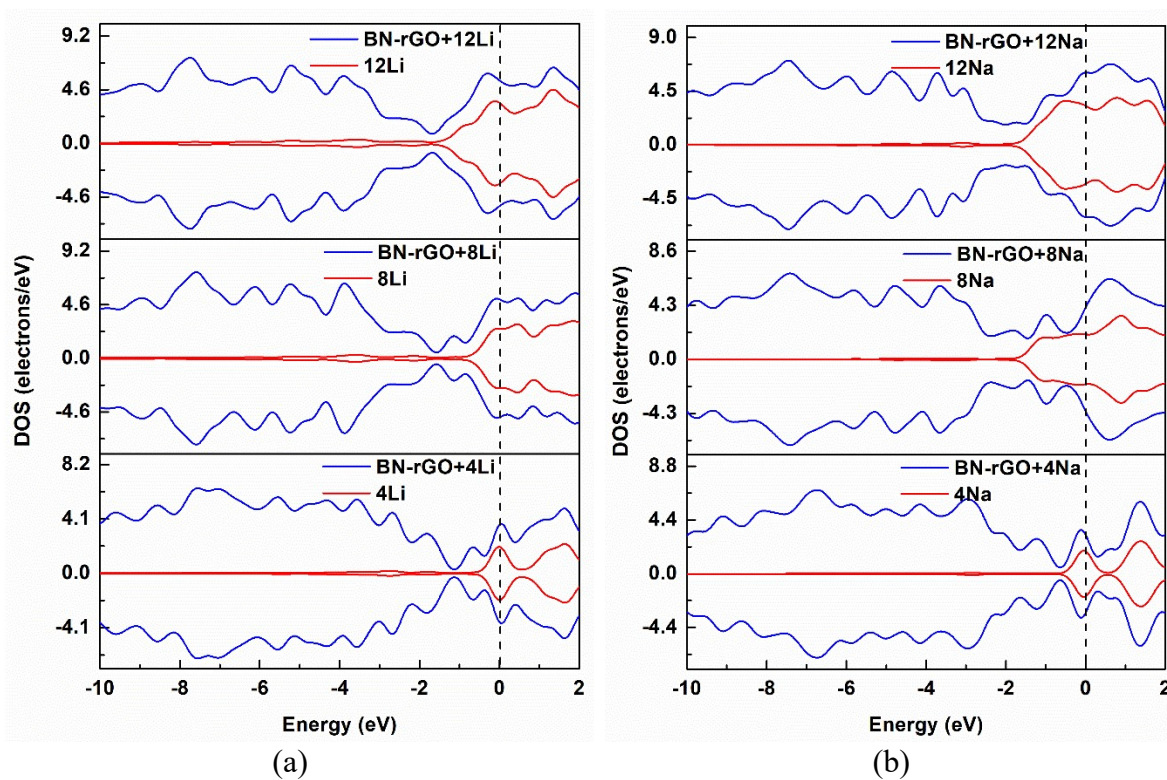

**Figure S6:** Spin polarized PDOS of BN-rGO nanosheet with diverse number of a) Li and b) Na atoms.
